# Supplementary material for: Assessment of Novel Anti-thrombotic Fusion Proteins for Inhibition of Stenosis in a Porcine Model of Arteriovenous Graft
Source: PLoS One. 2015 Sep 11;10(9):e0137381. doi: 10.1371/journal.pone.0137381 (PMC4567316; doi:10.1371/journal.pone.0137381)
Supplement: S2 File — PT and PTT plasma coagulation results from control, TAP-ANV- and ANV-6L15-treated pigs. (XLSX) [file pone.0137381.s002.xlsx]

## Sheet: Sheet1
	PT							PTT
	PRE	POST	AVG PRE	AVG POST	PAIRED TTEST			PRE	POST	AVG PRE	AVG POST	PAIRED TTEST
6L15	10.7	10.9					6L15	11.1	12.6
	10.6	11.4						12.5	13.9
	10.7	na						13.3	na
	11.1	11						13	13.4
	10.3	10.5						14.3	13.4
	10.9	10.7						14.2	13.1
	11.4	11.7						12.6	14.1
	10.5	11.1						12.5	10.8
	9.9	10.3						10.4	11
	9.6	9.9						10.3	<10
	10	10.5						12.4	10.7
	10.3	10.3	10.5	10.7545	0.0130713			11	12.7	12.3	12.57	0.707862
TAP-ANV	10.3	10.6	0.515223	0.527946			TAP-ANV	13.7	14.1	1.34907	1.28586
	11.7	11.6						14.1	13.9
	11.3	9.9						30.1	14.4
	10.1	10.9						14.5	14.7
	10.6	11.7						13.7	14.6
	10.5	11.8						12.2	15.2
	10.5	10.5						12.6	12.9
	10.4	10.8						13.4	13
	9.2	9.6						10	11
	10.8	10.9	10.54	10.83	0.253627			12.5	12.7	14.68	13.65	0.54971
CONTROL	10.1	10.3	0.671979	0.733409			CONTROL	11.4	12.7	5.56613	1.25366
	10.9	11.3						15.7	17.3
	10.1	10.4						13.4	13.1
	10.2	11						12.1	12.7
	11.1	10.8						12.5	12.7
	10.3	10.6						<10	16.2
	10.4	10.2						10.9	11.2
	10.3	10.3						13.3	11.4
	na	10						na	10.9
	na	10.4						na	10
	10.1	10.2						11.4	10.4
	10.6	11.2						<10	<10
	10.4	11.3						<10	12.4
	9.7	na*						15.6	na*
	10.7	10.7	10.3769	10.6214	0.0352227			16.1	15.3	13.24	12.7923	1
			0.374508	0.437086						1.94148	2.23736
